# Supplementary material
Source: PubMed Central journal article supplement (PMC8639796)
Supplement: NIHMS1757201-supplement-1.pdf [file NIHMS1757201-supplement-1.pdf]

# Supporting information: Numerical recipes for faster MAS-DNP simulations

Frederic Mentink-Vigier\*

National High Magnetic Field Laboratory, Florida State University, 1800 E. Paul Dirac Dr, FL, 32310, USA

[fmentink@magnet.fsu.edu](mailto:fmentink@magnet.fsu.edu)

## Table of Contents

|                                                                                                   |          |
|---------------------------------------------------------------------------------------------------|----------|
| <b>Full Liouville versus Hilbert / Liouville formalism.....</b>                                   | <b>1</b> |
| <b>Hilbert Liouville simulations, <math>S &gt; 1/2</math>.....</b>                                | <b>2</b> |
| <b>Impact of the <math>^{15}\text{N}</math> relaxation times on the proton polarization .....</b> | <b>3</b> |

## Full Liouville versus Hilbert / Liouville formalism

Figure S1 reports the time dependence of the polarization of a 3 spins system {2 electrons – 1 proton} after 100 ms of evolution. The simulations were carried out via two methods, the full Liouville and the Hilbert/Liouville formalism, corresponding respectively to the full lines or the dashed lines. The two methods are nearly identical.

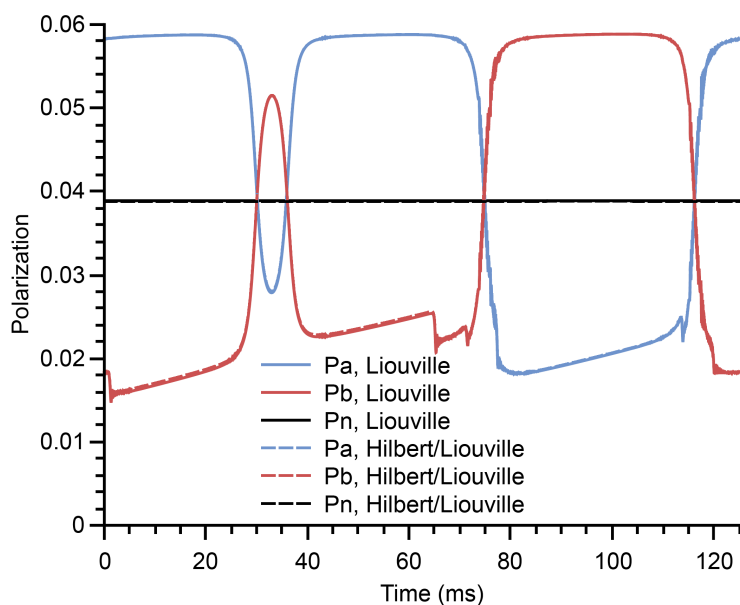

Fig. SI 1: Single crystal MAS-DNP simulations with a 3 spins system {2 electrons – 1 proton} computed with two methods: the full Liouville (full line) or the Hilbert/Liouville (dashed line). Blue, polarization of electron spin a, red polarization of electron spin b, black proton polarization.

### Hilbert Liouville simulations, $S > 1/2$

Figure Fig. SI 2 corresponds to the broader MAS-DNP spectra reported in figure 9 in the main text. For the CE case (right), one can observe enhancement outside of the central transition region which seems to correspond to satellite transition ( $3/2 \leftrightarrow 1/2$ ,  $-3/2 \leftrightarrow -1/2$ ,  $5/2 \leftrightarrow 3/2$ ,  $-5/2 \leftrightarrow -3/2$ ) that generate cross effect.

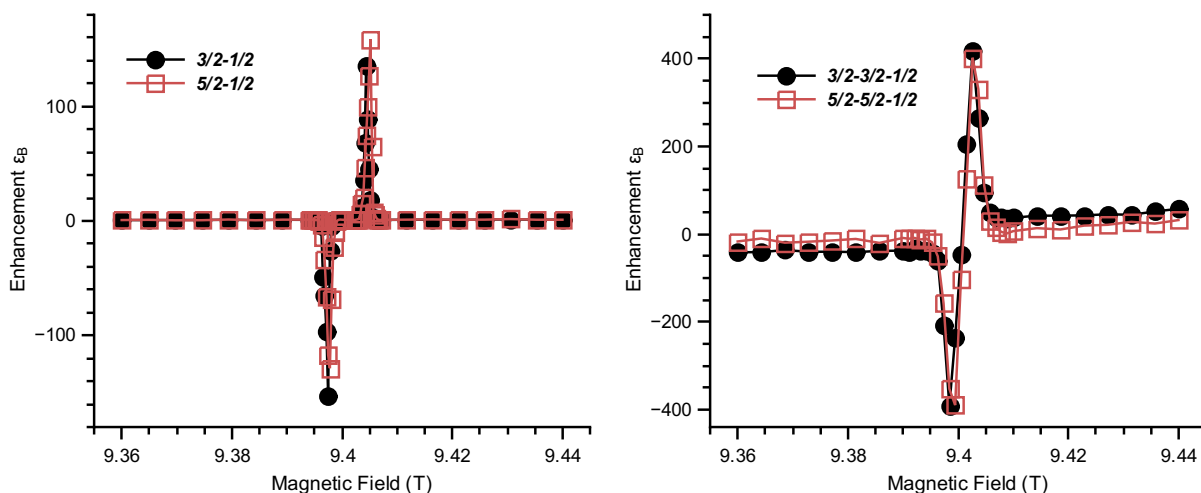

Fig. SI 2: MAS-DNP field profile computed with the hybrid Hilbert/Liouville method after 25 ms evolution. Left, Solid Effect case with one electron spin  $3/2$  (black circles) or  $5/2$  (red open squares) and one carbon atom; Right, Cross-Effect case with two electrons spin  $3/2$  (black circles) or  $5/2$  (red open squares) and one carbon. All spectra were computed with the equidistant integration and 2048 points.

Figure Fig. SI 3 corresponds to the calculated MAS-DNP field profile of {electron spin  $3/2$  - electron spin  $3/2$  and carbon} computed for two different evolution durations: 12.5 ms and 100 ms. Both MAS-DNP spectra are identical.

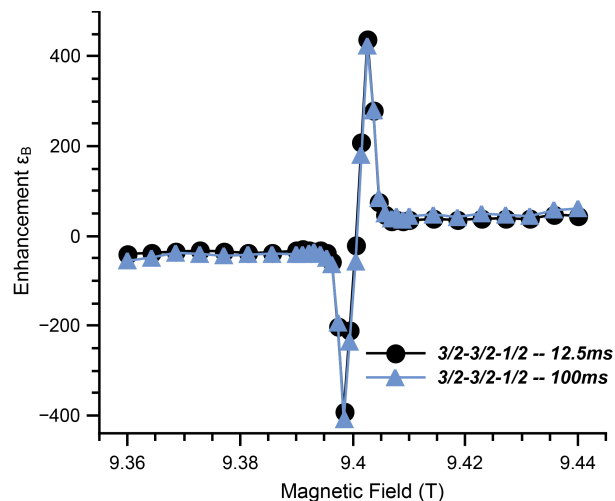

Fig. SI 3: MAS-DNP field profile computed with the hybrid Hilbert/Liouville method evolution. Cross-Effect case with two electrons spin 3/2 and one carbon computed after 12.5 ms (black circles) and 100 ms (blue triangles) of free evolution. All spectra were computed with the equidistant integration and 2048 points.

### Impact of the $^{15}\text{N}$ relaxation times on the proton polarization

Fig. SI 4 reports the impact of the  $^{15}\text{N}$  longitudinal relaxation time on the proton enhancement. Even for short  $^{15}\text{N}$  longitudinal relaxation times, the proton polarization is unaffected. This confirms that the nitrogen spin dynamics on the biradicals can safely be neglected in the regime tested.

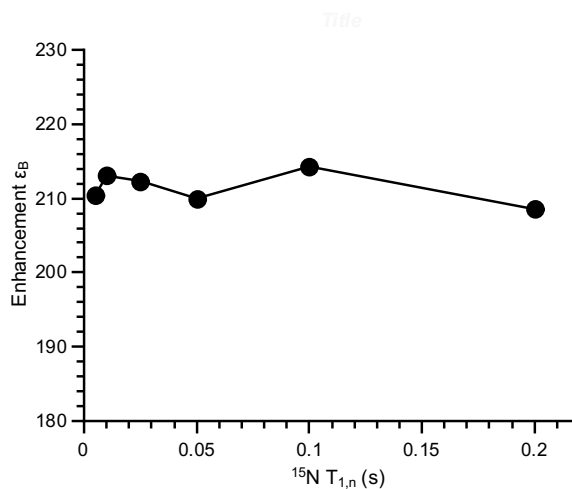

Fig. SI 4: MAS-DNP proton enhancement  $\epsilon_B$  computed with the hybrid Hilbert/Liouville method after 100 ms of free evolution of a spin mimicking a AMUPol labelled with  $^{15}\text{N}$ . Black circles represent a 5 spins system {2 electrons spin  $\frac{1}{2}$ , 2  $^{15}\text{N}$ , 1 proton}. Both secular and pseudo-secular  $^{15}\text{N}$  hyperfine coupling terms are considered, and the  $^{15}\text{N}$  relaxation time is varied.  $T_{2,n}^{15\text{N}}$  was set to 3 ms.
